## Genome-scale analysis identifies GJB2 and ERO1LB as prognosis markers in patients with pancreatic cancer

Tao Zhu<sup>1,2</sup>, Yuan-Feng Gao<sup>1,2</sup>, Yi-Xin Chen<sup>1,2</sup>, Zhi-Bin Wang<sup>1,2</sup>, Ji-Ye Yin<sup>1,2</sup>, Xiao-Yuan Mao<sup>1,2</sup>, Xi Li<sup>1,2</sup>, Wei Zhang<sup>1,2</sup>, Hong-Hao Zhou<sup>1,2</sup>, Zhao-Qian Liu<sup>1,2</sup>

<sup>1</sup>Department of Clinical Pharmacology, Xiangya Hospital, Central South University, Changsha 410008, P. R. China

<sup>2</sup>Institute of Clinical Pharmacology, Central South University, Hunan Key Laboratory of Pharmacogenetics, Changsha 410078, P. R. China

Correspondence to: Zhao-Qian Liu, email: liuzhaoqian63@126.com

Keywords: pancreatic cancer, GJB2, ERO1LB, prognosis

Received: November 02, 2016

Accepted: January 09, 2017

Published: February 03, 2017

### ABSTRACT

**Pancreatic cancer is a complex and heterogeneous disease with the etiology largely unknown. The deadly nature of pancreatic cancer, with an extremely low 5-year survival rate, renders urgent a better understanding of the molecular events underlying it. The aim of this study is to investigate the gene expression module of pancreatic adenocarcinoma and to identify differentially expressed genes (DEGs) with prognostic potentials. Transcriptome microarray data of five GEO datasets (GSE15471, GSE16515, GSE18670, GSE32676, GSE71989), including 117 primary tumor samples and 73 normal pancreatic tissue samples, were utilized to identify DEGs. The five sets of DEGs had an overlapping subset consisting of 98 genes (90 up-regulated and 8 down-regulated), which were probably common to pancreatic cancer. Gene ontology (GO) analysis of the 98 DEGs showed that cell cycle and cell adhesion were the major enriched processes, and extracellular matrix (ECM)-receptor interaction and p53 signaling pathway were the most enriched pathways according to Kyoto Encyclopedia of Genes and Genomes (KEGG) pathway analysis. Elevated expression of gap junction protein beta 2 (GJB2) and reduced endoplasmic reticulum oxidoreductase 1-like beta (ERO1LB) expression were validated in an independent cohort. Kaplan-Meier survival analysis revealed that GJB2 and ERO1LB levels were significantly associated with the overall survival of pancreatic cancer patients. GJB2 and ERO1LB are implicated in pancreatic cancer progression and can be used to predict patient survival. Therapeutic strategies targeting GJB2 and facilitating ERO1LB expression may deserve evaluation to improve prognosis of pancreatic cancer patients.**

### INTRODUCTION

Pancreatic adenocarcinoma is the most common type of pancreatic cancer, accounting for 85% of cases, and is a leading cause of cancer associated death worldwide [1]. The incidence of pancreatic tumors keeps rising although its counterparts of other common tumors are declining [2]. In most cases, symptoms do not show up until the malignancy progresses into advanced stages when surgical resection, the only potential curative therapy, is no longer possible, which leads to a dismal 5-year survival rate [1, 3]. Relapse of the disease after treatment for those 10-20% of patients with resectable tumor also contributes to a poor prognosis [4, 5]. What makes the situation worse is the

existence of a subgroup of cancer stem cells (CSCs) within the tumor in that they harbor resistance to chemotherapy and radiation therapy [6–8].

The cause of pancreatic adenocarcinoma is complex and remains to be further elucidated. Smoking and inherited mutations are believed to be two dominant risk factors for this disease [9, 10]. Evolution of pancreatic cancer from precursor lesions to invasive malignancy is marked by accumulating genetic mutations [11]. More than 90% of tumors have oncogenic *KRAS* mutations and more than 50% of cases have inactivation mutations of tumor suppressor genes including *CDKN2A*, *TP53* and *SMAD4* [12–15]. Current knowledge of pancreatic cancer is far from satisfactory to prevent and treat this

deadly disease, a better understanding of the underlying molecular events is a prerequisite to improve early diagnosis, efficacy of conventional therapy, and to open new avenues to pancreatic cancer treatment.

Genome-wide profiling offers insights into tumorigenesis and proves to be an efficient way to thoroughly identify pathogenic genes [16]. To investigate the gene expression program and to identify novel targets with therapeutic and prognostic potentials in pancreatic adenocarcinoma at the genome-wide scale, we integrated transcriptome microarray data of five independent pancreatic adenocarcinoma datasets and identified 98 DEGs which were common to all these five expression profiles. After validation of a subgroup of DEGs by using an additional pancreatic adenocarcinoma dataset, we found that *GJB2* were upregulated and *ERO1LB* downregulated in malignant tissues than in normal pancreatic tissues. Patients with higher *GJB2* or declined *ERO1LB* expression had a poorer overall survival rate according to Kaplan-Meier analysis. These results suggested that *GJB2* and *ERO1LB* were potential biomarkers for pancreatic adenocarcinoma whose expression alterations were implicated in development and progression of this malignancy and were associated with prognosis. Therapeutic strategies targeting *GJB2* and facilitating *ERO1LB* expression may deserve evaluation to improve prognosis of pancreatic cancer patients.

## RESULTS

### Identification of DEGs between pancreatic adenocarcinomas and non-malignant tissues

GSE15471, GSE16515, GSE18670, GSE32676 and GSE71989 were used as the discovery datasets for identification of genes differentially expressed in pancreatic cancer. The discovery datasets included 73 normal pancreatic tissue samples and 117 primary tumor samples which were from multiple research sites. Detailed information was listed in Supplementary Table 1. Samples of these five datasets consisted of tumor samples and normal pancreatic samples. Samples in GSE15471 and GSE18670 were pairs including expression data of both tumor and adjacent normal tissues. To investigate gene expression alteration associated with pancreatic cancer progression, we first explored the DEGs of the above five datasets. There were 972 genes (794 genes up-regulated and 178 genes down-regulated) in GSE15471, 858 genes (646 up-regulated and 212 down-regulated) in GSE16515, 664 genes (496 up-regulated and 168 down-regulated) in GSE18670, 759 genes (484 up-regulated and 275 down-regulated) in GSE32676 and 2070 genes (1594 up-regulated and 476 down-regulated) in GSE71989 which were identified as DEGs between normal tissues and tumorous tissues (Figure 1A–1E). Further two-dimensional hierarchical clustering revealed

a marked difference of expression modules of the DEGs, with separate clusters between normal and tumor tissues (Supplementary Figure 1A-1E). The intersecting part of the five sets of DEGs consisted of 98 elements. These 98 DEGs were common to all pancreatic tumor samples analyzed and were believed to be relevant in development and progression of this malignancy (Figure 1F), they were listed in Table 1. Among the 98 DEGs, *SI00P* (S100 calcium binding protein P) was the top 1 ranked up-regulated gene (Supplementary Figure 2A-2E), in line with previous studies [17, 18].

### Functional enrichment analysis of DEGs

To gain insight into the biological roles of DEGs involved in pancreatic adenocarcinoma progression, we performed the GO enrichment analysis and KEGG pathway enrichment analysis. Most of the enriched GO terms belonged to the biological process category. Cell cycle and cell adhesion were the most relevant biological processes, with nearly half of the terms participating in regulating cell cycle and cell adhesion. In terms of cellular component, the enriched GO terms were mainly spindle and extracellular matrix. Of the 4 enriched GO molecular function terms, three were associated with enzyme inhibitor activity (Figure 2A). In addition, KEGG pathway analysis indicated that ECM-receptor interaction and p53 signaling pathway were the most significantly enriched pathways (Figure 2B). It is interesting to note that the ECM receptor interaction pathway mirrored the enriched GO cellular component terms, suggesting that aberrations of extracellular matrix might play an important role in pancreatic cancer progression.

### Validation of DEGs in independent pancreatic adenocarcinomas

To further verify the altered expressions of DEGs in an independent dataset, GSE71729, generated from a different platform, was used as a validation cohort which included 46 normal pancreatic samples and 145 primary pancreatic tumor samples (Supplementary Table 1). Considering that *GJB2* was one of the top 2 ranked up-regulated genes in addition to *SI00P* and that *ERO1LB* one of the top ranked down-regulated genes, we focused on these two genes for further analysis in this study. For each of the five discovery datasets, *GJB2* expression was markedly elevated while *ERO1LB* expression significantly reduced in pancreatic adenocarcinoma samples than in control samples (Figure 3A–3B). In consistent with these findings, higher expression levels of *GJB2* and declined levels of *ERO1LB* were seen in the malignant samples of the validation cohort (Figure 4A–4B). These results suggested that *GJB2* and *ERO1LB* dysregulation was associated with tumorigenesis of pancreatic adenocarcinoma.

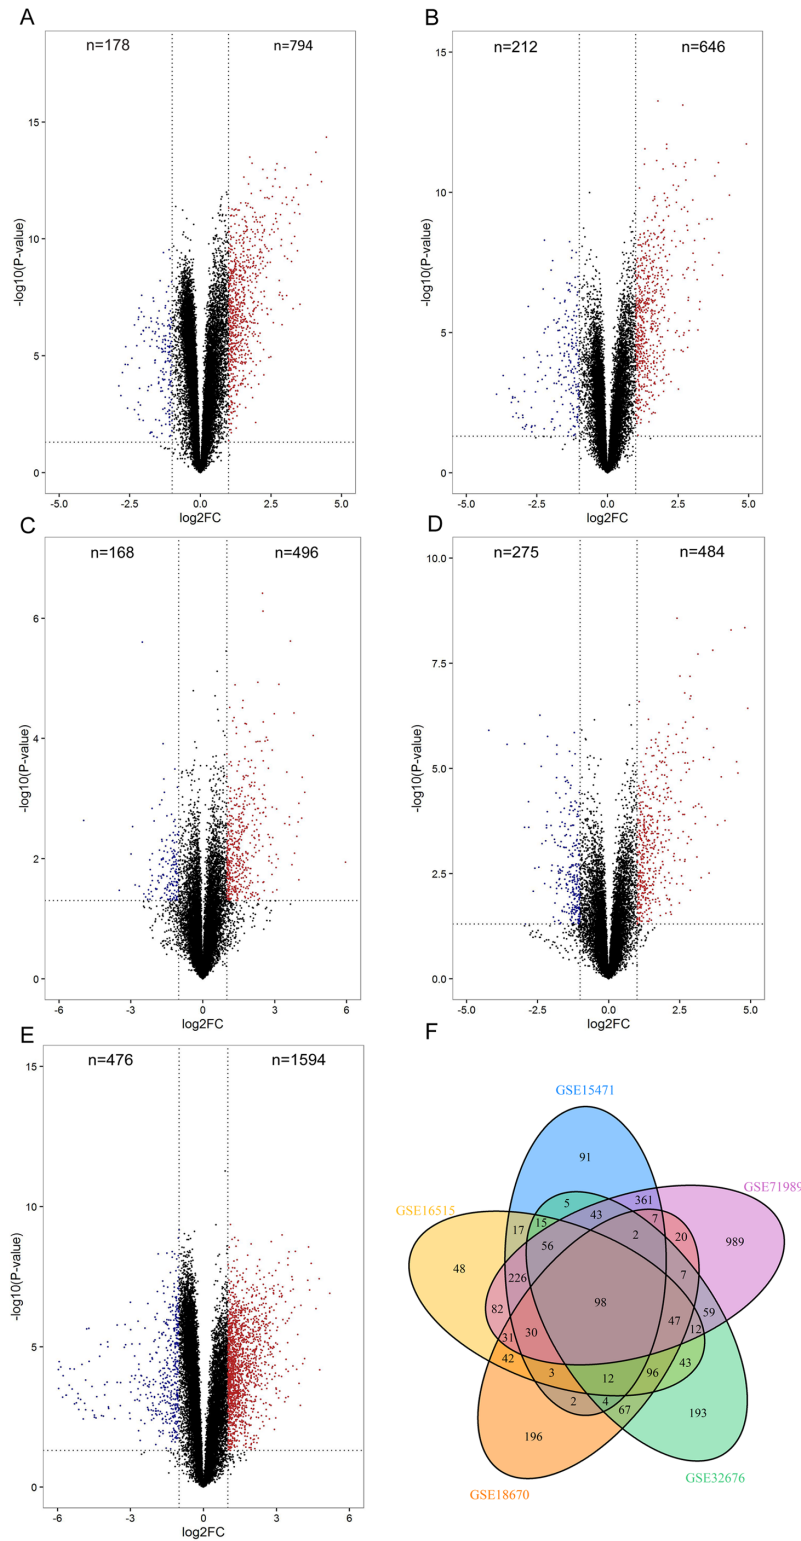

**Figure 1: Identification of DEGs between pancreatic adenocarcinomas and non-malignant tissues. A-E.** Volcano plots of differentially expressed genes. 794 genes were identified up-regulated and 178 genes down-regulated in GSE15471 (A), 646 genes up-regulated and 212 genes down-regulated in GSE16515 (B), 496 genes up-regulated and 168 genes down-regulated in GSE18670 (C), 484 genes up-regulated and 275 genes down-regulated in GSE32676 (D) and 1594 genes up-regulated and 476 genes down-regulated in GSE71989 (E). **F.** Venn diagram of the overlapping parts of the five sets of DEGs. Ninety-eight DEGs in total were common to all DEGs sets.

**Table 1: Common DEGs identified in pancreatic adenocarcinoma**

| Regulation     | DEGs (Gene Symbol)                                                                                                                                                                                                                                                                                                                                                                                                                                                                                                                                                                                                                                                                   |
|----------------|--------------------------------------------------------------------------------------------------------------------------------------------------------------------------------------------------------------------------------------------------------------------------------------------------------------------------------------------------------------------------------------------------------------------------------------------------------------------------------------------------------------------------------------------------------------------------------------------------------------------------------------------------------------------------------------|
| Up-regulated   | S100P, GJB2, COL5A1, CST1, SLC6A14, IGFBP3, SLPI, SHISA2, JUP///KRT17, DKK1, C19orf33, IFI27, SDR16C5, PPAPDC1A, LAMC2, TMEM158, ITGA2, SFN, S100A6, ANO1, GPRC5A, FOXQ1, SFTA2, AMIGO2, TMPRSS4, ISG15, LY75, PMEPA1, GCNT3, NQO1, TNFRSF21, TSPAN1, KRT19, LAMB3, CD55, PLAC8, MSLN, NMU, EFNB2, S100A2, BIK, LY6E, PMAIP1, MAL2, HK2, SAMD9, OSBPL3, C1orf106, ANLN, KLF5, PI3, MGLL, HN1, CDH3, MLPH, LOC102724257///TMC5, MALL, RACGAP1, MBOAT2, ITGA3, WNT5A, SDC1, FAM83D, AHNAK2, RTP4, MELK, PKM, CDC20, ARNTL2, S100A16, ECM1, CENPK, MTMR11, FAT1, ZWINT, IFI6, SERPINB5, ZG16B, KCNN4, CEACAM5, CEP55, MPZL2, RHPN2, CDC42EP5, PRC1, SPAG1, CCNB1, ABHD17C, AOC1, DLGAP5 |
| Down-regulated | PAIP2B, ERO1LB, IAPP, AF070581, FAM46C, CA4, FAM150B, AOX1                                                                                                                                                                                                                                                                                                                                                                                                                                                                                                                                                                                                                           |

**GJB2 and ERO1LB expression were indicators for prognosis of patients with pancreatic adenocarcinoma**

We further asked whether the elevated expression of *GJB2* or down-regulated *ERO1LB* levels in pancreatic cancer could affect patient survival. Pancreatic adenocarcinoma data with gene expression and clinical information from The Cancer Genome Atlas (TCGA) was used to investigate their prognostic significances. One hundred and sixty-five pancreatic cancer patients were included in this analysis. Their clinical characteristics were summarized in Table 2. Either *GJB2* high expression group or *ERO1LB* low expression group had significantly poorer

overall survival ( $P = 0.001$ , hazard ratio: 2.082, 95% CI: 1.342-3.230, Figure 5A;  $P = 0.047$ , hazard ratio: 0.6417, 95% CI: 0.4141-0.9944, Figure 5B). The median survival period was 23.03 months for *GJB2* high expression group, and it dropped to 16.03 months in *GJB2* low expression group. *ERO1LB* low expression group had a reduced median survival period, 15.77 months, as compared with the median survival of the high expression group which was 21.73 months. These results indicated that *GJB2* was an adverse factor while *ERO1LB* a beneficial factor for survival of pancreatic adenocarcinoma patients. During the KEGG pathway analysis, we found that integrin subunit alpha 3 (ITGA3), a member of the integrin family which functions as a cell surface adhesion molecule, was

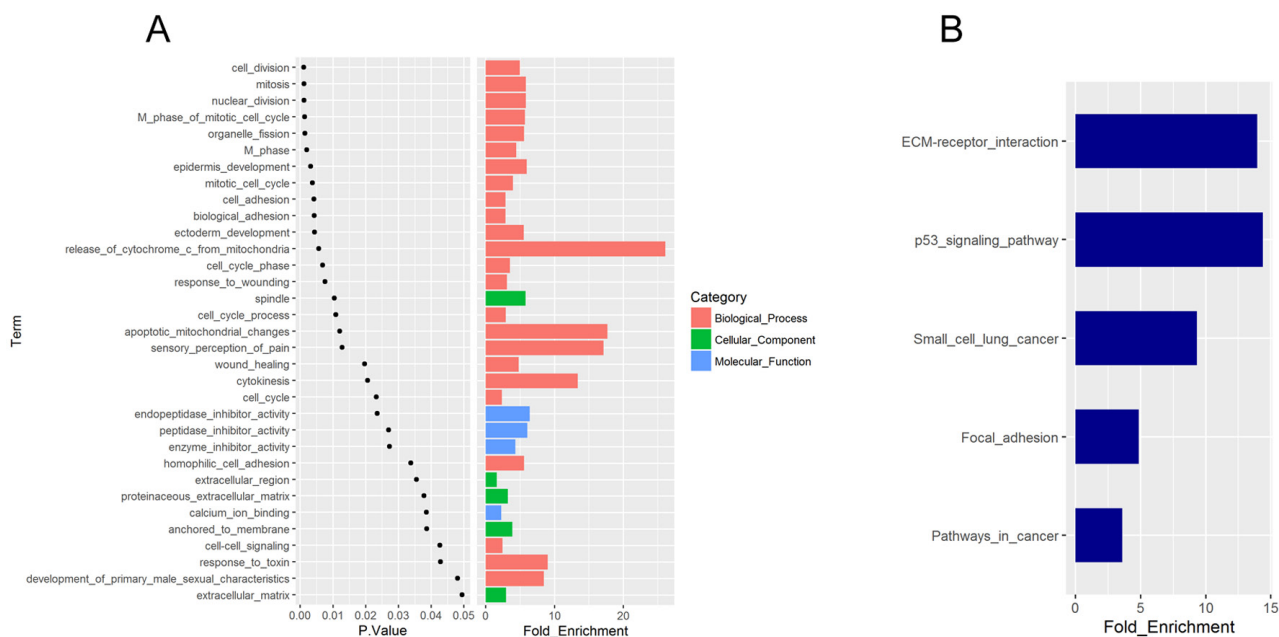

**Figure 2: GO and KEGG pathway enrichment analysis of the 98 DEGs. A.** The significantly enriched GO terms. **B.** KEGG pathways significantly enriched, with  $P < 0.05$ .

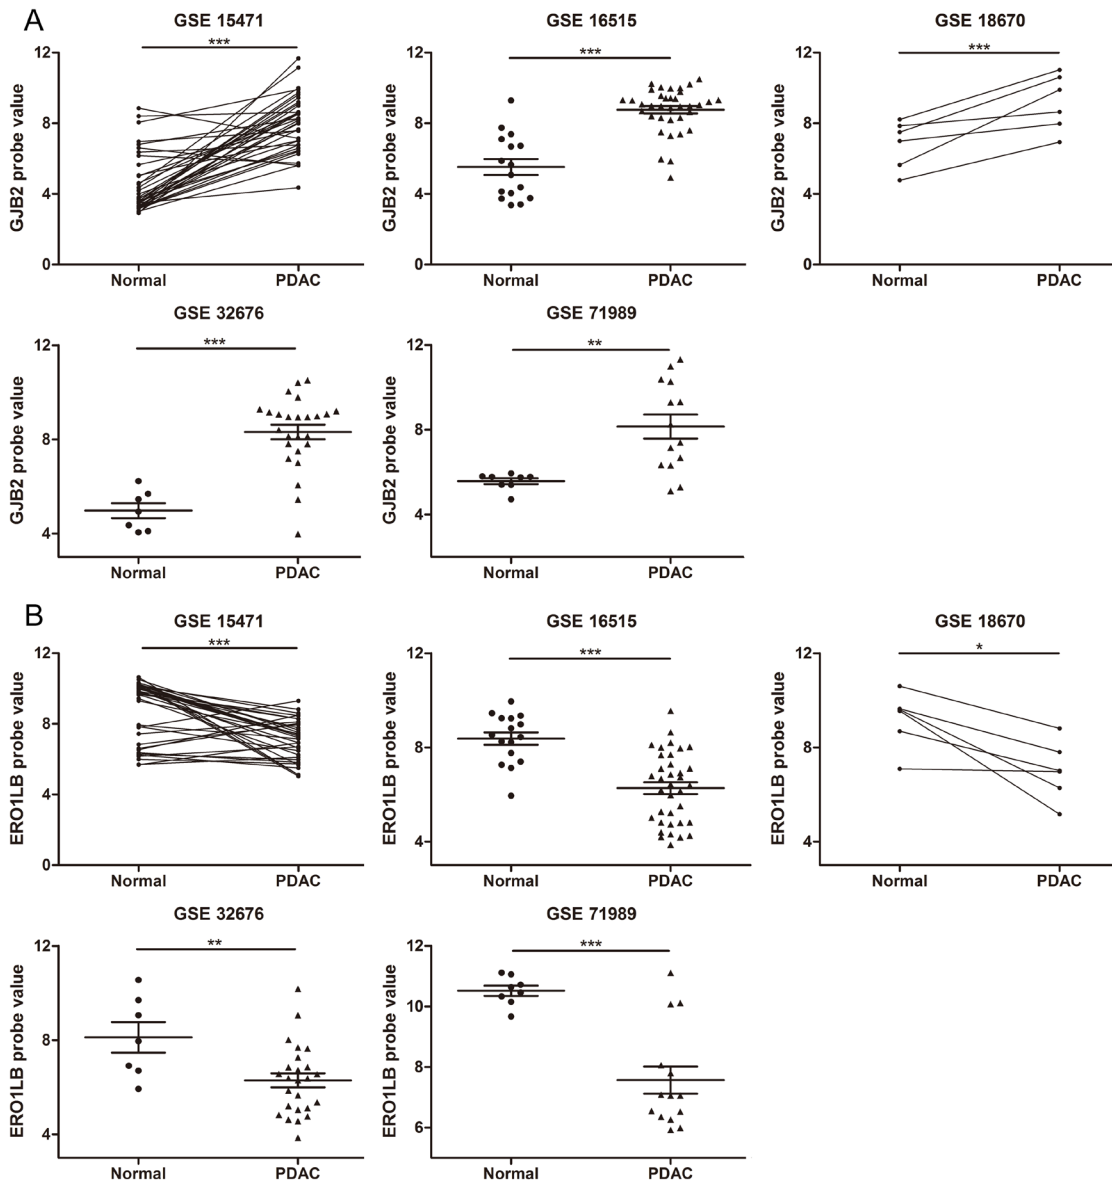

**Figure 3: Differential expression of *GJB2* and *ERO1LB* in the discovery datasets. A. *GJB2* expression was remarkably increased in PDAC than in normal pancreatic tissues. B. *ERO1LB* expression significantly declined in PDAC tissues. Samples in GSE15471 and GSE18670 were pairs of adjacent normal and tumor tissue samples. \* means  $P < 0.05$ , \*\*  $P < 0.01$ , \*\*\*  $P < 0.001$ .**

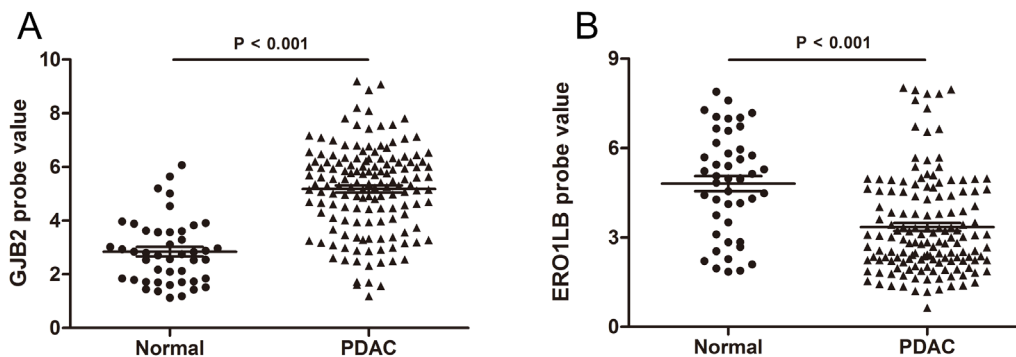

**Figure 4: Validation of differential expression of *GJB2* and *ERO1LB* in GSE71729. A. Elevated expression of *GJB2* in pancreatic adenocarcinoma. B. Reduced expression of *ERO1LB* in pancreatic adenocarcinoma.**

**Table 2: Correlation between GJB2, ERO1LB expression and clinicopathologic features of PDAC patients**

| Factor    | Number | GJB2           |                 | P     | ERO1LB         |                 | P     |
|-----------|--------|----------------|-----------------|-------|----------------|-----------------|-------|
|           |        | Low expression | High expression |       | Low expression | High expression |       |
| Gender    |        |                |                 |       |                |                 |       |
| Male      | 91     | 47 (51.6)      | 44 (48.4)       | 0.578 | 48 (52.7)      | 43 (47.3)       | 0.385 |
| Female    | 74     | 35 (47.3)      | 39 (52.7)       |       | 34 (45.9)      | 40 (54.1)       |       |
| Age       |        |                |                 |       |                |                 |       |
| ≥ 60      | 114    | 56 (49.1)      | 58 (50.9)       | 0.825 | 58 (50.9)      | 56 (49.1)       | 0.650 |
| < 60      | 51     | 26 (51.0)      | 25 (49.0)       |       | 24 (47.1)      | 27 (52.9)       |       |
| TNM stage |        |                |                 |       |                |                 |       |
| ≥ II      | 144    | 68 (47.2)      | 76 (52.8)       | 0.096 | 76 (52.8)      | 68 (47.2)       | 0.038 |
| I         | 21     | 14 (66.7)      | 7 (33.3)        |       | 6 (28.6)       | 15 (71.4)       |       |
| Grade     |        |                |                 |       |                |                 |       |
| III + IV  | 48     | 21 (43.8)      | 27 (56.2)       | 0.328 | 23 (47.9)      | 25 (52.1)       | 0.770 |
| I + II    | 117    | 61 (52.1)      | 56 (47.9)       |       | 59 (50.4)      | 58 (49.6)       |       |

involved in 4 of the 5 enriched pathways except the p53 signaling pathway. And its increased expression led to a dismal prognosis (Supplementary Figure 3A-3C), in agreement with a previous report [19].

## DISCUSSION

This study explored modifications of gene expression modules in pancreatic adenocarcinoma at the genome-wide scale by integrating multiple pancreatic cancer transcriptome microarray datasets, which we believe was able to identify alterations at the molecular

level with more accuracies, as compared with studies based on a single dataset. For instance, we screened 98 DEGs which were observed in all the pancreatic cancer samples analyzed. Of these DEGs, some were previously recognized regulators associated with this malignancy, such as *S100P* [18], *ITGA3*[19], *ITGA2* [20], *LAMC2* [21], *SERPINB5* [22], *SDCI* [23] and *CST1* [24], some were identified involved in this disease for the first time (Table 1). Further validation of genes with altered expression was based on data from a different platform, which was of benefits in terms of evading platform-specific biases.

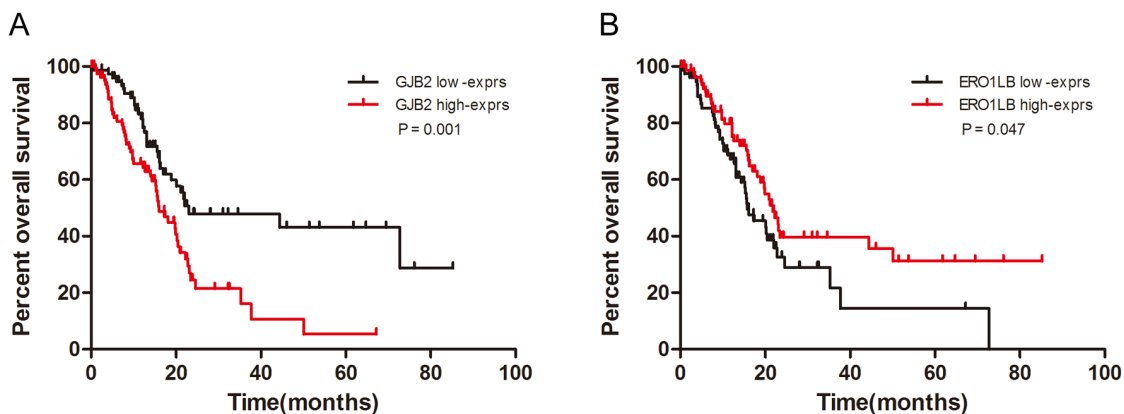

**Figure 5: Overall survival curves based on GJB2 and ERO1LB expression.** **A.** The survival curves of *GJB2* high expression group and *GJB2* low expression group. *GJB2* high expression was associated with poor overall survival (median survival, 16.03 vs. 23.03 months,  $P = 0.001$ , hazard ratio: 2.082, 95% CI: 1.342-3.230). **B.** The survival curves of *ERO1LB* high expression group and *ERO1LB* low expression group. *ERO1LB* low expression was associated with poor overall survival (median survival, 21.73 vs. 15.77 months,  $P = 0.047$ , hazard ratio: 0.6417, 95% CI: 0.4141-0.9944). Patients were divided into low- and high-exprs group according to the gene's median probe value.

Our analysis indicated that pancreatic adenocarcinoma was marked by dysfunctions of cell adhesion, extracellular matrix and cell cycle. The top 3 up-regulated DEGs were all involved in these processes. Cell adhesion dysfunction contributes to, at least in part, the inclination to metastasis of pancreatic cancer, and this propensity is a result of multiple activated signaling pathways in the malignancy [6]. It has been recognized that a dense stroma, with enormous quantities of extracellular matrix in the surrounding area, is a defining characteristic of pancreatic adenocarcinoma [4, 25]. Our gene annotation analysis supported this, considering the enriched cellular components of extracellular matrix and the enriched ECM-receptor interaction pathway.

Up-regulated *GJB2* expression was found at the transcriptional level, in line with a previous immunohistochemical result [26]. In addition, its overexpression was found associated with poorer prognosis. *GJB2* encodes a gap junction protein which plays a role in communication between adjacent cells. In the pancreatic tumor microenvironment, gap junction proteins might facilitate exchange of signals between tumor cells and stroma cells which contributed to progression of the disease, just like their involvement in breast cancer [27]. *GJB2* mutations were frequently identified in hereditary deafness, normal functions of *GJB2* have been believed essential for hearing [28, 29]. *ERO1LB* is generally endoplasmic reticulum-localized and facilitates generation of oxidative conditions and formation of disulfide bond [30, 31]. It is a pancreas-specific oxidoreductase which was reported to promote insulin biosynthesis and deregulation of which was involved in the pathogenesis of diabetes mellitus [32, 33]. Our analysis revealed that *ERO1LB* was implicated in pancreatic adenocarcinoma whose expression was lower in tumor tissues than in normal pancreatic tissues. Besides, pancreatic adenocarcinoma patients with low *ERO1LB* expression had poorer overall survival than those with high *ERO1LB* expression, suggesting a potential of *ERO1LB* to serve as a prognostic marker. It is interesting to note that up-regulated expression of *ERO1LB* was immunohistochemically detected in pancreatic neuroendocrine tumor (PNET) tissues [34], highlighting different molecular events underlying the two tumor types.

Our study queried the altered gene expression modules of pancreatic adenocarcinoma and identified a set of differentially expressed genes. *GJB2* and *ERO1LB* levels were shown to have prognostic significance and therapeutic strategies targeting *GJB2* and facilitating *ERO1LB* expression may deserve evaluation to improve prognosis of pancreatic cancer patients. However, all our analyses were based on samples from primary tumors, we were not able to clarify the gene expression program of the metastatic tumors. Further efforts are needed to understand the underlying mechanisms of the malignancy, especially mechanisms of the early stages and metastatic tumors.

## MATERIALS AND METHODS

### Pancreatic adenocarcinoma datasets

The discovery and validation datasets were obtained from the Gene Expression Omnibus (GEO, <https://www.ncbi.nlm.nih.gov/geo/>). The DEGs were identified using five independent pancreatic adenocarcinoma microarray datasets including GSE15471, GSE16515, GSE18670, GSE32676 and GSE71989, with 190 samples in total (117 primary tumor samples and 73 normal control samples). These datasets were generated from the same detecting microarray platform: [HG-U133\_Plus\_2] Affymetrix Human Genome U133 Plus 2.0 Array. GSE15471 and GSE18670 datasets were composed of matched tumor samples and adjacent non-tumor samples. Data of circulation tumor samples and haematological cells in GSE18670 were not included in this study. GSE71729 dataset including 145 primary pancreatic ductal adenocarcinomas and 46 normal pancreatic samples was used as a validation dataset, the platform of which was Agilent-014850 Whole Human Genome Microarray 4x44K G4112F. TCGA pancreatic adenocarcinoma gene expression data (IlluminaHiSeq) and the associated clinical data was downloaded from the UCSC Cancer Browser (<https://genome-cancer.ucsc.edu/>) for survival analysis. Data from normal samples and data without follow-up information was removed and finally 165 samples were eligible for survival analysis.

### Data preprocessing

The raw probe-level data (.CEL files) was processed through the robust multiarray average algorithm RMA in the Affy package of R [35]. Expression values were achieved after background correction, quantile normalization and summarizing probe set values into one expression measure. Annotations for the probe arrays were downloaded from GEO. For the cases of multiple probe sets mapping to the same gene, the averages of the probe sets values were taken as the expression values [36].

### DEGs screening and clustering

The limma package was used for identification of DEGs [37]. Genes with  $|\log_2 \text{fold change (FC)}| > 1$  and  $P < 0.05$  were considered to be differentially expressed between tumors and normal tissues. Hierarchical clustering of the DEGs was based on the Euclidean method which calculates the distance and on complete linkage which is for the tree construction. Visualization of the identified DEGs including volcano plot, venn diagram and heat map was achieved by using ggplot2, VennDiagram and gplots packages of R, respectively.

## Functional enrichment analysis

During functional enrichment analysis of the 98 common DEGs, the online software Database for Annotation, Visualization, and Integrated Discovery (DAVID, <https://david.ncifcrf.gov/>) was utilized to perform GO analysis and KEGG pathway analysis [38, 39]. Terms with  $P < 0.05$  were considered as significantly enriched.

## Statistical analysis

SPSS software (version 22.0, SPSS, Chicago, IL) and GraphPad Prism (version 5, GraphPad Software Inc., San Diego, CA) were used for statistical analysis. Student's *t*-tests were applied for comparisons of two sample groups. Survival analysis was performed through the Kaplan-Meier method and the log-rank test was used to evaluate the statistical significance of the differences. Differences were considered as statistically significant when  $P < 0.05$ .

## ACKNOWLEDGMENTS AND FUNDING

This work was supported by the National Key Research and Development Plan (SQ2016YFSF110100, 2016YFC0905000), National Natural Science Foundation of China (81373490, 81573508, 81573463), Hunan Provincial Science and Technology Plan of China (2015JC3025), and Open Foundation of Innovative Platform in University of Hunan Province of China (421530004).

## CONFLICTS OF INTEREST

The authors declare no conflicts of interest.

## REFERENCES

1. Ryan DP, Hong TS, Bardeesy N. Pancreatic adenocarcinoma. *The New England journal of medicine*. 2014; 371:1039-1049.
2. Vincent A, Herman J, Schulick R, Hruban RH, Goggins M. Pancreatic cancer. *Lancet*. 2011; 378:607-620.
3. Hackert T, Ulrich A, Buchler MW. Borderline resectable pancreatic cancer. *Cancer letters*. 2016; 375:231-237.
4. Hidalgo M. Pancreatic cancer. *The New England journal of medicine*. 2010; 362:1605-1617.
5. Reznik R, Hendifar AE, Tuli R. Genetic determinants and potential therapeutic targets for pancreatic adenocarcinoma. *Frontiers in physiology*. 2014; 5:87.
6. Chiu JW, Wong H, Leung R, Pang R, Cheung TT, Fan ST, Poon R, Yau T. Advanced pancreatic cancer: flourishing novel approaches in the era of biological therapy. *The oncologist*. 2014; 19:937-950.
7. Ischenko I, Seeliger H, Kleespies A, Angele MK, Eichhorn ME, Jauch KW, Bruns CJ. Pancreatic cancer stem cells: new understanding of tumorigenesis, clinical implications. *Langenbeck's archives of surgery*. 2010; 395:1-10.
8. Jimeno A, Feldmann G, Suarez-Gauthier A, Rasheed Z, Solomon A, Zou GM, Rubio-Viqueira B, Garcia-Garcia E, Lopez-Rios F, Matsui W, Maitra A, Hidalgo M. A direct pancreatic cancer xenograft model as a platform for cancer stem cell therapeutic development. *Molecular cancer therapeutics*. 2009; 8:310-314.
9. Midha S, Chawla S, Garg PK. Modifiable and non-modifiable risk factors for pancreatic cancer: A review. *Cancer letters*. 2016; 381:269-277.
10. Hassan MM, Bondy ML, Wolff RA, Abbruzzese JL, Vauthey JN, Pisters PW, Evans DB, Khan R, Chou TH, Lenzi R, Jiao L, Li D. Risk factors for pancreatic cancer: case-control study. *The American journal of gastroenterology*. 2007; 102:2696-2707.
11. Feldmann G, Beaty R, Hruban RH, Maitra A. Molecular genetics of pancreatic intraepithelial neoplasia. *Journal of hepato-biliary-pancreatic surgery*. 2007; 14:224-232.
12. Kanda M, Matthaei H, Wu J, Hong SM, Yu J, Borges M, Hruban RH, Maitra A, Kinzler K, Vogelstein B, Goggins M. Presence of somatic mutations in most early-stage pancreatic intraepithelial neoplasia. *Gastroenterology*. 2012; 142:730-733 e739.
13. Jones S, Zhang X, Parsons DW, Lin JC, Leary RJ, Angenendt P, Mankoo P, Carter H, Kamiyama H, Jimeno A, Hong SM, Fu B, Lin MT, et al. Core signaling pathways in human pancreatic cancers revealed by global genomic analyses. *Science*. 2008; 321:1801-1806.
14. Mimeault M, Brand RE, Sasson AA, Batra SK. Recent advances on the molecular mechanisms involved in pancreatic cancer progression and therapies. *Pancreas*. 2005; 31:301-316.
15. Tuveson DA, Hingorani SR. Ductal pancreatic cancer in humans and mice. *Cold Spring Harbor symposia on quantitative biology*. 2005; 70:65-72.
16. Gao YF, Mao XY, Zhu T, Mao CX, Liu ZX, Wang ZB, Li L, Li X, Yin JY, Zhang W, Zhou HH, Liu ZQ. COL3A1 and SNAP91: novel glioblastoma markers with diagnostic and prognostic value. *Oncotarget*. 2016; 7:70494-70503. doi: 10.18632/oncotarget.12038.
17. Logsdon CD, Simeone DM, Binkley C, Arumugam T, Greenson JK, Giordano TJ, Misek DE, Kuick R, Hanash S. Molecular profiling of pancreatic adenocarcinoma and chronic pancreatitis identifies multiple genes differentially regulated in pancreatic cancer. *Cancer research*. 2003; 63:2649-2657.
18. Crnogorac-Jurcevic T, Missiaglia E, Blaveri E, Gangeswaran R, Jones M, Terris B, Costello E, Neoptolemos JP, Lemoine NR. Molecular alterations in pancreatic carcinoma: expression profiling shows that



- dysregulated expression of S100 genes is highly prevalent. *The Journal of pathology*. 2003; 201:63-74.
19. Zhu GH, Huang C, Qiu ZJ, Liu J, Zhang ZH, Zhao N, Feng ZZ, Lv XH. Expression and prognostic significance of CD151, c-Met, and integrin alpha3/alpha6 in pancreatic ductal adenocarcinoma. *Digestive diseases and sciences*. 2011; 56:1090-1098.
  20. Nones K, Waddell N, Song S, Patch AM, Miller D, Johns A, Wu J, Kassahn KS, Wood D, Bailey P, Fink L, Manning S, Christ AN, et al. Genome-wide DNA methylation patterns in pancreatic ductal adenocarcinoma reveal epigenetic deregulation of SLIT-ROBO, ITGA2 and MET signaling. *International journal of cancer*. 2014; 135:1110-1118.
  21. Kosanam H, Prassas I, Chrystoja CC, Soleas I, Chan A, Dimitromanolakis A, Blasutig IM, Ruckert F, Gruetzmann R, Pilarsky C, Maekawa M, Brand R, Diamandis EP. Laminin, gamma 2 (LAMC2): a promising new putative pancreatic cancer biomarker identified by proteomic analysis of pancreatic adenocarcinoma tissues. *Molecular & cellular proteomics: MCP*. 2013; 12:2820-2832.
  22. Mardin WA, Petrov KO, Enns A, Senninger N, Haier J, Mees ST. SERPINB5 and AKAP12 - expression and promoter methylation of metastasis suppressor genes in pancreatic ductal adenocarcinoma. *BMC cancer*. 2010; 10:549.
  23. Conejo JR, Kleeff J, Koliopanos A, Matsuda K, Zhu ZW, Goecke H, Bicheng N, Zimmermann A, Korc M, Friess H, Buchler MW. Syndecan-1 expression is up-regulated in pancreatic but not in other gastrointestinal cancers. *International journal of cancer*. 2000; 88:12-20.
  24. Jiang J, Liu HL, Liu ZH, Tan SW, Wu B. Identification of cystatin SN as a novel biomarker for pancreatic cancer. *Tumour biology: the journal of the International Society for Oncodevelopmental Biology and Medicine*. 2015; 36:3903-3910.
  25. Chu GC, Kimmelman AC, Hezel AF, DePinho RA. Stromal biology of pancreatic cancer. *Journal of cellular biochemistry*. 2007; 101:887-907.
  26. Kyo N, Yamamoto H, Takeda Y, Ezumi K, Ngan CY, Terayama M, Miyake M, Takemasa I, Ikeda M, Doki Y, Dono K, Sekimoto M, Nojima H, et al. Overexpression of connexin 26 in carcinoma of the pancreas. *Oncology reports*. 2008; 19:627-631.
  27. Banerjee D. Connexin's Connection in Breast Cancer Growth and Progression. *International journal of cell biology*. 2016; 2016:9025905.
  28. Denoyelle F, Weil D, Maw MA, Wilcox SA, Lench NJ, Allen-Powell DR, Osborn AH, Dahl HH, Middleton A, Houseman MJ, Dode C, Marlin S, Boulila-ElGaed A, et al. Prelingual deafness: high prevalence of a 30delG mutation in the connexin 26 gene. *Human molecular genetics*. 1997; 6:2173-2177.
  29. Lin L, Wang YF, Wang SY, Liu SF, Yu Z, Xi L, Li HW. Ultrastructural pathological changes in the cochlear cells of connexin 26 conditional knockout mice. *Molecular medicine reports*. 2013; 8:1029-1036.
  30. Pagani M, Fabbri M, Benedetti C, Fassio A, Pilati S, Bulleid NJ, Cabibbo A, Sitia R. Endoplasmic reticulum oxidoreductin 1-lbeta (ERO1-Lbeta), a human gene induced in the course of the unfolded protein response. *The Journal of biological chemistry*. 2000; 275:23685-23692.
  31. Mezghrani A, Fassio A, Benham A, Simmen T, Braakman I, Sitia R. Manipulation of oxidative protein folding and PDI redox state in mammalian cells. *The EMBO journal*. 2001; 20:6288-6296.
  32. Zito E, Chin KT, Blais J, Harding HP, Ron D. ERO1-beta, a pancreas-specific disulfide oxidase, promotes insulin biogenesis and glucose homeostasis. *The Journal of cell biology*. 2010; 188:821-832.
  33. Awazawa M, Futami T, Sakada M, Kaneko K, Ohsugi M, Nakaya K, Terai A, Suzuki R, Koike M, Uchiyama Y, Kadowaki T, Ueki K. Deregulation of pancreas-specific oxidoreductin ERO1beta in the pathogenesis of diabetes mellitus. *Molecular and cellular biology*. 2014; 34:1290-1299.
  34. Xie J, Zhu Y, Chen H, Shi M, Gu J, Zhang J, Shen B, Deng X, Zhan X, Peng C. The Immunohistochemical Evaluation of Solid Pseudopapillary Tumors of the Pancreas and Pancreatic Neuroendocrine Tumors Reveals ERO1Lbeta as a New Biomarker. *Medicine*. 2016; 95:e2509.
  35. Irizarry RA, Hobbs B, Collin F, Beazer-Barclay YD, Antonellis KJ, Scherf U, Speed TP. Exploration, normalization, and summaries of high density oligonucleotide array probe level data. *Biostatistics*. 2003; 4:249-264.
  36. Li W, Li K, Zhao L, Zou H. Bioinformatics analysis reveals disturbance mechanism of MAPK signaling pathway and cell cycle in Glioblastoma multiforme. *Gene*. 2014; 547:346-350.
  37. Diboun I, Wernisch L, Orenge CA, Koltzenburg M. Microarray analysis after RNA amplification can detect pronounced differences in gene expression using limma. *BMC genomics*. 2006; 7:252.
  38. Dennis G, Jr., Sherman BT, Hosack DA, Yang J, Gao W, Lane HC, Lempicki RA. DAVID: Database for Annotation, Visualization, and Integrated Discovery. *Genome biology*. 2003; 4:P3.
  39. Kanehisa M, Goto S, Sato Y, Furumichi M, Tanabe M. KEGG for integration and interpretation of large-scale molecular data sets. *Nucleic acids research*. 2012; 40:D109-114.
