# Supplementary material for: Genome-scale analysis identifies GJB2 and ERO1LB as prognosis markers in patients with pancreatic cancer
Source: PubMed Central journal article supplement (PMC5400583; doi:10.18632/oncotarget.15068), 2017-02-03
Supplement: oncotarget-08-21281-s001.pdf [file oncotarget-08-21281-s001.pdf]

# Genome-scale analysis identifies GJB2 and ERO1LB as prognosis markers in patients with pancreatic cancer

## SUPPLEMENTARY FIGURES AND TABLE

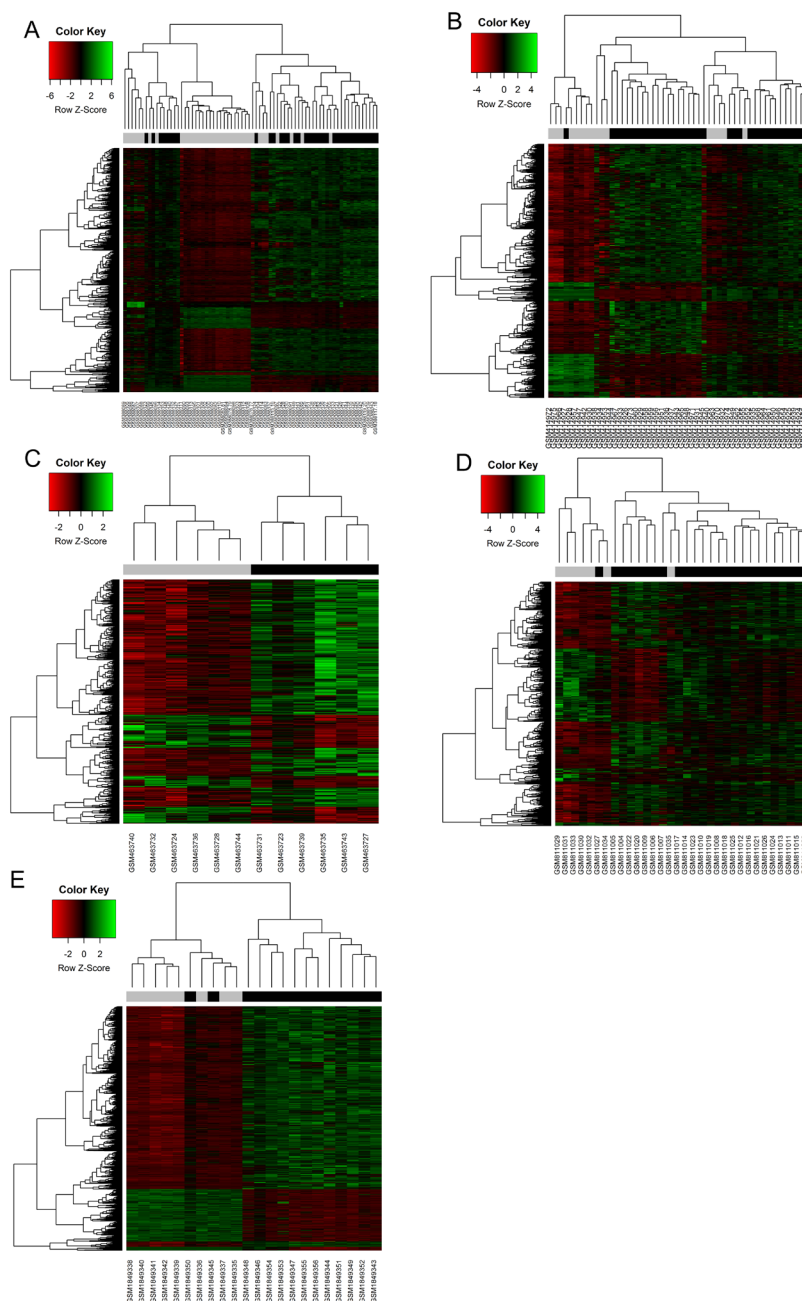

**Supplementary Figure 1: Heatmap of gene expression based on two-dimensional hierarchical clustering of the DEGs in the five datasets. A. GSE15471; B. GSE16515; C. GSE18670; D. GSE32676; E. GSE71989.** Genes are in rows and samples are in columns. Normal tissues were represented with gray spots and tumor tissues were represented with black spots.

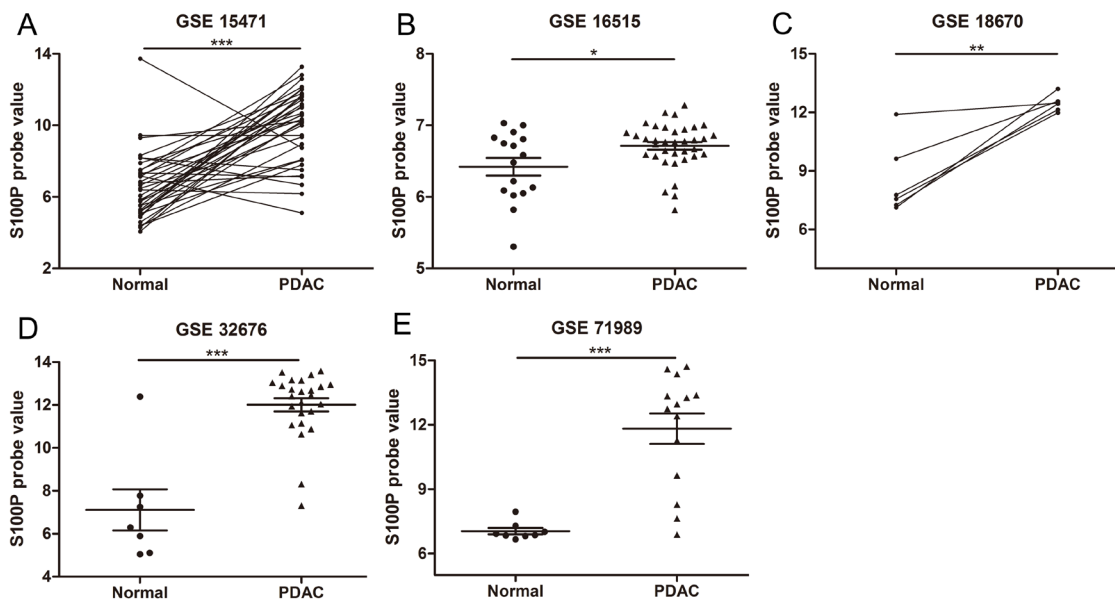

**Supplementary Figure 2: Elevated expression of S100P in the five discovery datasets.** A. GSE15471; B. GSE16515; C. GSE18670; D. GSE32676; E. GSE71989. Samples in GSE15471 and GSE18670 were pairs of adjacent normal and tumor tissue samples. \* means  $P < 0.05$ , \*\*  $P < 0.01$ , \*\*\*  $P < 0.001$ .

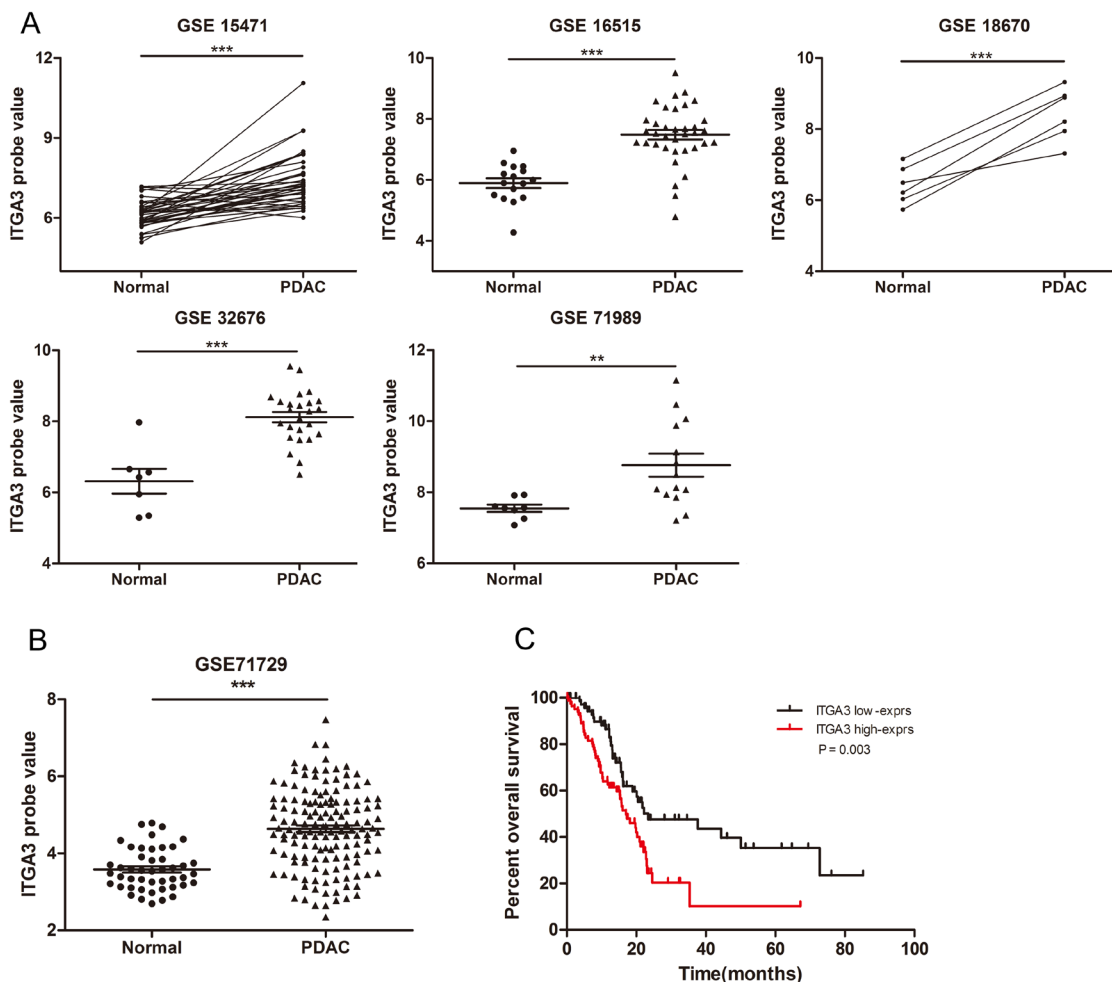

**Supplementary Figure 3: Overall survival curves based on *ITGA3* expression.** **A.** Elevated expression of *ITGA3* in the discovery datasets. **B.** Increased expression of *ITGA3* in pancreatic adenocarcinoma in the validation cohort. **C.** The survival curves of *ITGA3* low expression group and *ITGA3* high expression group. *ITGA3* high expression was associated with poor survival (median survival, 17.03 vs. 23.40 months,  $P = 0.003$ , hazard ratio: 1.946, 95% CI: 1.250-3.030). Patients were divided into *ITGA3* low- and high-exprs group according to the median probe value of *ITGA3*.

Supplementary Table 1: List of pancreatic adenocarcinoma datasets used in this study

| Dataset           | Research Institute                                                          | Platform                                                  | #Sample |        | Tumor type                        | PMID          |
|-------------------|-----------------------------------------------------------------------------|-----------------------------------------------------------|---------|--------|-----------------------------------|---------------|
|                   |                                                                             |                                                           | #Normal | #Tumor |                                   |               |
| <b>Discovery</b>  |                                                                             |                                                           |         |        |                                   |               |
| GSE15471          | AI and Bioinformatics, Research, ICI                                        | Affymetrix HG-U133_Plus_2                                 | 36      | 36     | PDAC                              | 19260470      |
| GSE16515          | Molecular Pharmacology and Experimental Therapeutics, Mayo Clinic           | Affymetrix HG-U133_Plus_2                                 | 16      | 36     | Pancreatic cancer (not specified) | 19732725      |
| GSE18670          | Nucleomics Core, Flanders Institute for Biotechnology (VIB)                 | Affymetrix HG-U133_Plus_2                                 | 6       | 6      | PDAC                              | 23157946      |
| GSE32676          | Department of Molecular and Medical Pharmacology, University of Los Angeles | Affymetrix HG-U133_Plus_2                                 | 7       | 25     | PDAC                              | 22261810      |
| GSE71989          | Pharmacy, University of Florida                                             | Affymetrix HG-U133_Plus_2                                 | 8       | 14     | PDAC                              | Not available |
| <b>Validation</b> |                                                                             |                                                           |         |        |                                   |               |
| GSE71729          | University of North Carolina                                                | Agilent-014850 Whole Human Genome Microarray 4x44K G4112F | 46      | 145    | PDAC                              | 26343385      |

PDAC, Pancreatic ductal adenocarcinoma.
